# Supplementary material
Source: Royal Society of Chemistry journal article supplement (doi:10.1039/d6nj01601d)
Supplement: d6nj01601d1.pdf [file d6nj01601d1.pdf]

# The high-valent vanadium chemistry of isoindoline chelates

Joan C. Bore,<sup>a</sup> S. M. Al Rafat,<sup>a</sup> Clara A. Hoffert,<sup>a</sup> Allison A. Ellis,<sup>a</sup> Cameron Blake,<sup>a</sup> Cristian  
Celis-Barros,<sup>b</sup> Wei-Yuan Chen,<sup>a</sup> Aliaksei Boika,<sup>a</sup> Briana R. Schrage,<sup>\*b</sup> and Christopher J.  
Ziegler<sup>\*a</sup>

<sup>a</sup> Department of Chemistry, University of Akron, Akron, Ohio 44325, United States.

<sup>b</sup> Radioisotope Science and Technology Division, Oak Ridge National Laboratory, 1 Bethel Valley  
Rd., Oak Ridge, Tennessee 37830, United States.

## Supplementary Information

## Table of Contents

|                                                                                                                                           |            |
|-------------------------------------------------------------------------------------------------------------------------------------------|------------|
| <b>Figure S1:</b> $^1\text{H}$ NMR (300 MHz) of <b>1VO<sub>2</sub></b> in d <sub>6</sub> -DMSO.....                                       | <b>S3</b>  |
| <b>Figure S2:</b> $^1\text{H}$ NMR (300 MHz) of <b>2VO<sub>2</sub></b> in d <sub>6</sub> -DMSO.....                                       | <b>S4</b>  |
| <b>Figure S3:</b> $^1\text{H}$ NMR (300 MHz) of <b>3VO<sub>2</sub></b> in d <sub>6</sub> -DMSO.....                                       | <b>S5</b>  |
| <b>Figure S4:</b> $^1\text{H}$ NMR (300 MHz) of <b>4VO(SO<sub>4</sub>)</b> in CDCl <sub>3</sub> .....                                     | <b>S6</b>  |
| <b>Figure S5:</b> $^1\text{H}$ NMR (300 MHz) of <b>4VO(acac)</b> in CDCl <sub>3</sub> .....                                               | <b>S7</b>  |
| <b>Figure S6:</b> EPR spectrum of <b>4VO(acac)</b> in DMF at 130 K. ....                                                                  | <b>S8</b>  |
| <b>Figure S7:</b> The UV-visible spectra of <b>1</b> and <b>1VO<sub>2</sub></b> in DMF.....                                               | <b>S9</b>  |
| <b>Figure S8:</b> The UV-visible spectra of <b>2</b> and <b>2VO<sub>2</sub></b> in DMF.....                                               | <b>S10</b> |
| <b>Figure S9:</b> The UV-visible spectra of <b>3</b> and <b>3VO<sub>2</sub></b> in DMF.....                                               | <b>S11</b> |
| <b>Figure S10:</b> The UV-visible spectra of <b>4</b> and <b>4VO(SO<sub>4</sub>)</b> and <b>4VO(acac)</b> in DMF.....                     | <b>S12</b> |
| <b>Figure S11:</b> Structure of compound <b>3</b> , with 35% probability ellipsoids. ....                                                 | <b>S13</b> |
| <b>Figure S12:</b> High-resolution ESI mass spectra of <b>1VO<sub>2</sub></b> .....                                                       | <b>S14</b> |
| <b>Figure S13:</b> High-resolution ESI mass spectra of <b>2VO<sub>2</sub></b> .....                                                       | <b>S15</b> |
| <b>Figure S14:</b> High-resolution ESI mass spectra of <b>4VO(SO<sub>4</sub>)</b> .....                                                   | <b>S16</b> |
| <b>Figure S15:</b> High-resolution ESI mass spectra of <b>4VO(acac)</b> .....                                                             | <b>S17</b> |
| <b>Figure S16:</b> Frontier molecular orbitals for dioxovanadate complexes. ....                                                          | <b>S18</b> |
| <b>Figure S17:</b> Frontier molecular orbitals for the <b>4VO(SO<sub>4</sub>)</b> and <b>4VO(acac)</b> complexes.....                     | <b>S19</b> |
| <b>Table S1:</b> X-ray crystal data and structure parameters for compounds <b>3</b> and <b>1VO<sub>2</sub>-3VO<sub>2</sub></b> . ....     | <b>S20</b> |
| <b>Table S2:</b> X-ray crystal data and structure parameters for compounds <b>4VO(SO<sub>4</sub>)</b> and <b>4VO(acac)</b> .....          | <b>S21</b> |
| <b>Table S3:</b> Selected bond lengths for <b>1VO<sub>2</sub>-3VO<sub>2</sub></b> , <b>4VO(SO<sub>4</sub>)</b> and <b>4VO(acac)</b> ..... | <b>S22</b> |

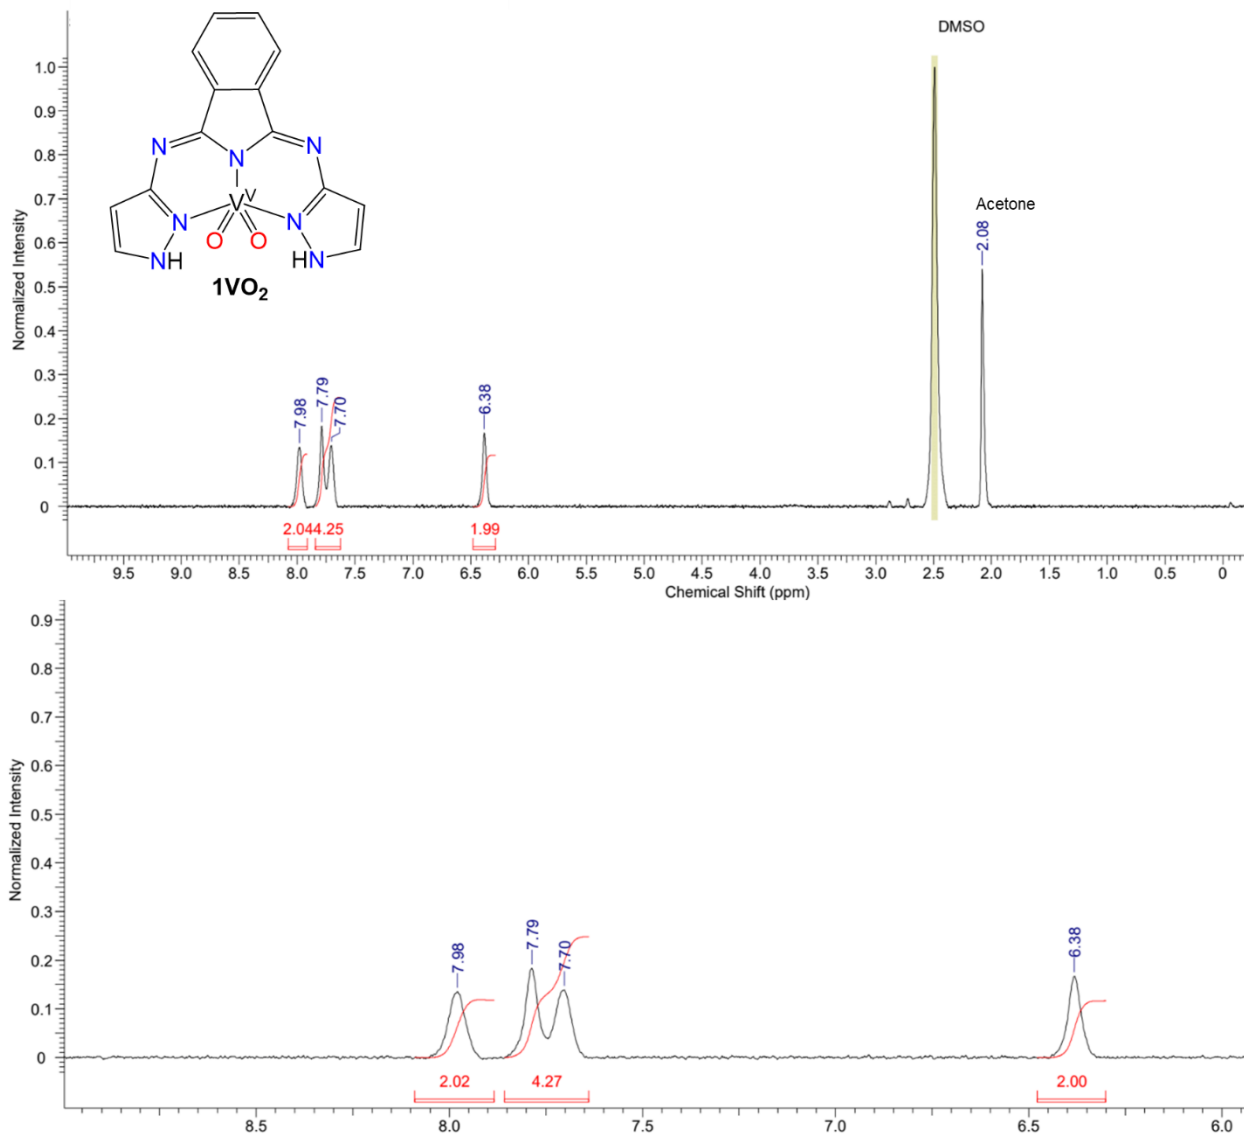

**Figure S1:**  $^1\text{H}$  NMR (300 MHz) of  $1\text{VO}_2$  in  $d_6$ -DMSO. Full spectrum on the top, zoomed in spectrum on the bottom.

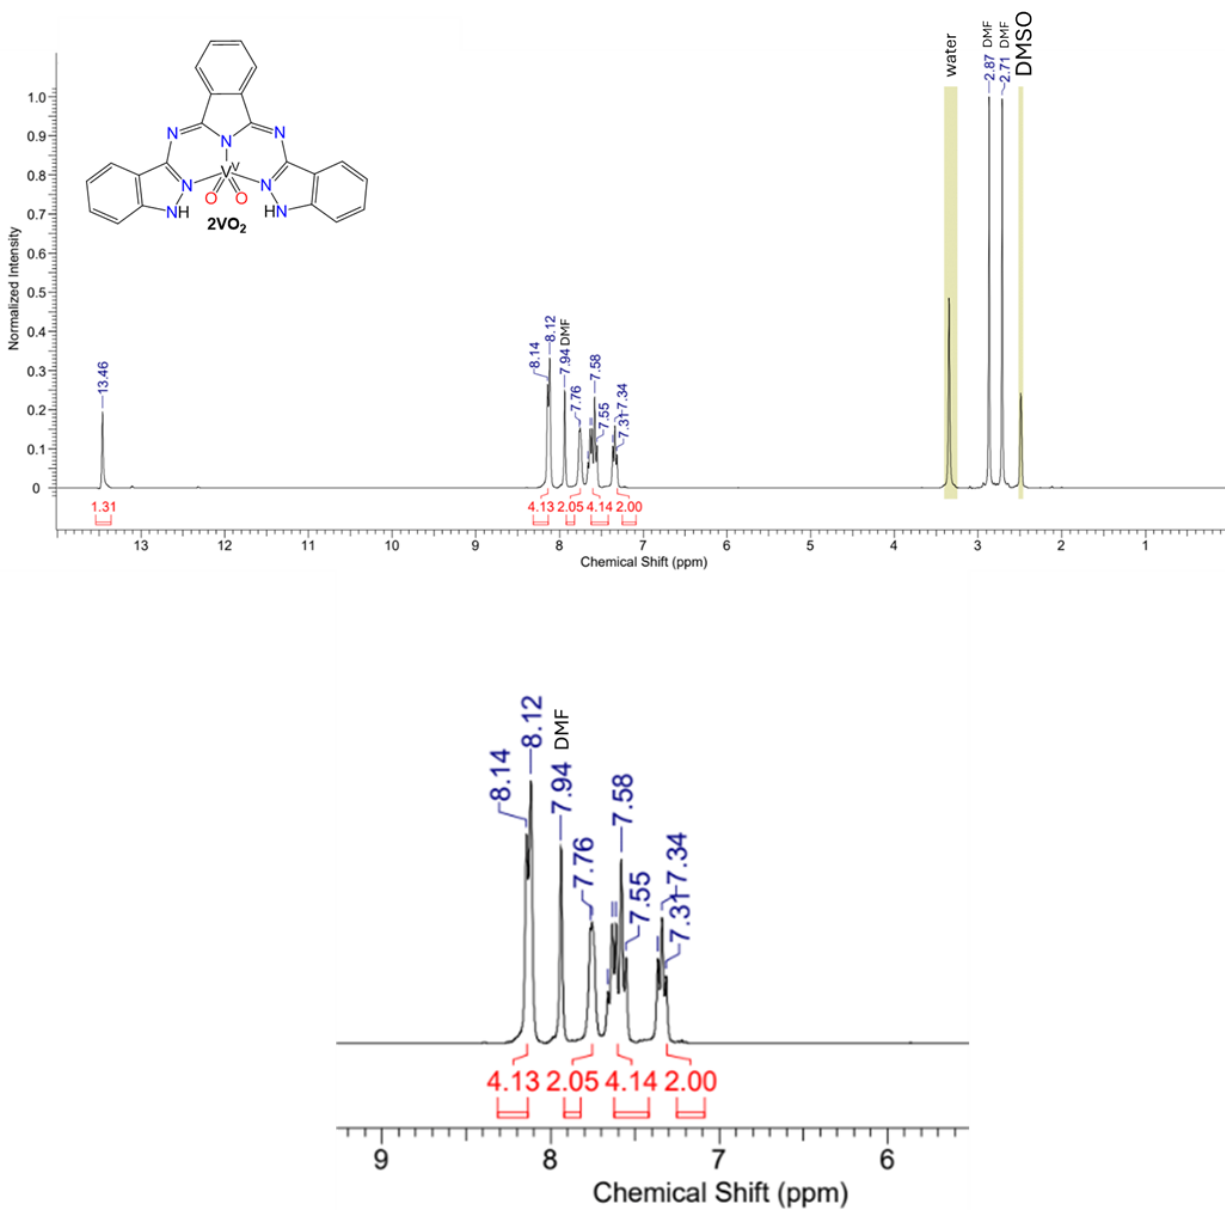

**Figure S2:**  $^1H$  NMR (300 MHz) of  $2VO_2$  in  $d_6$ -DMSO. Full spectrum on the top, zoomed in spectrum on the bottom.

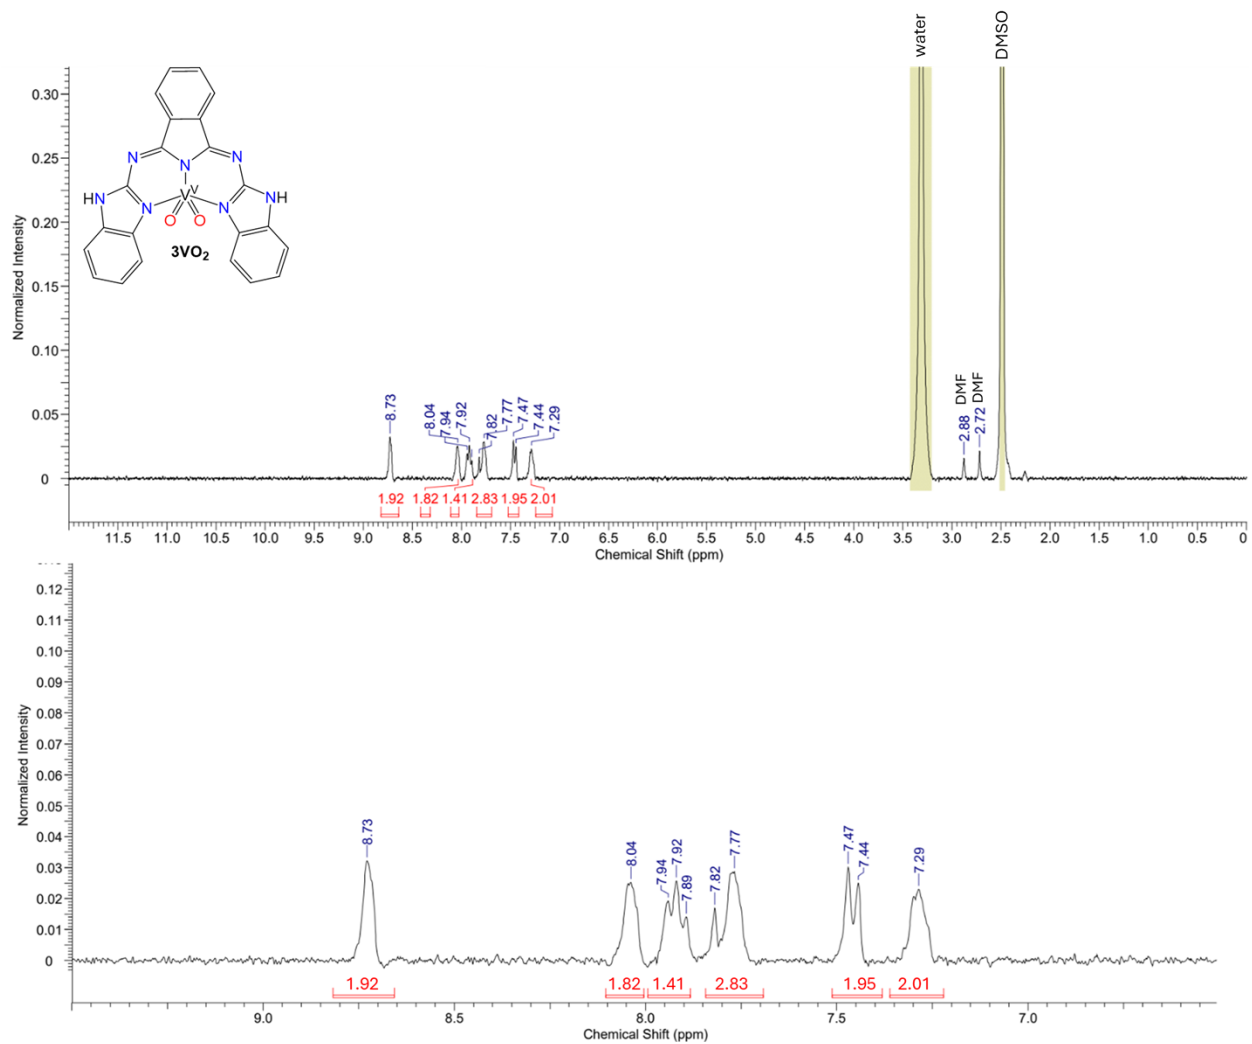

**Figure S3:**  $^1\text{H}$  NMR (300 MHz) of  $3\text{VO}_2$  in  $d_6$ -DMSO. Full spectrum on the top, zoomed in spectrum on the bottom.

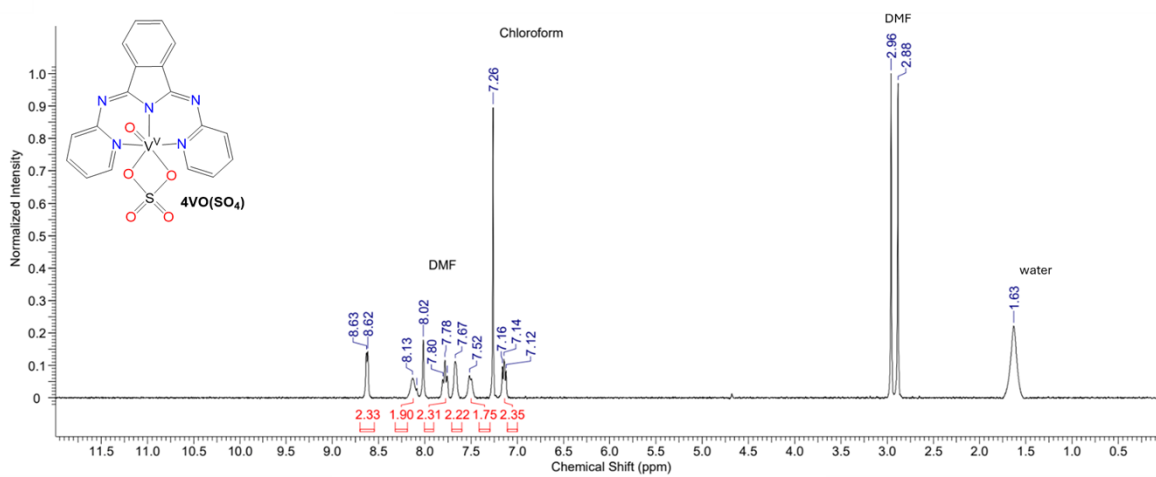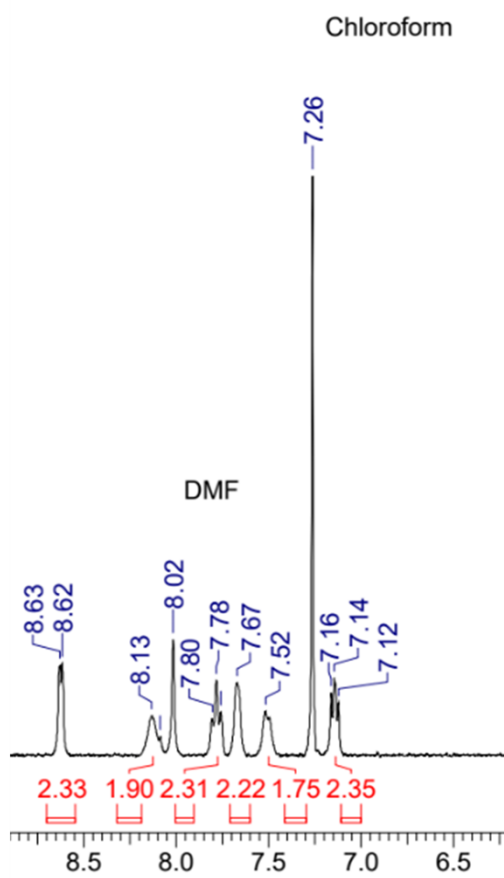

**Figure S4:**  $^1H$  NMR (300 MHz) of  $4VO(SO_4)$  in  $CDCl_3$ . Full spectrum on the top, zoomed in spectrum on the bottom.

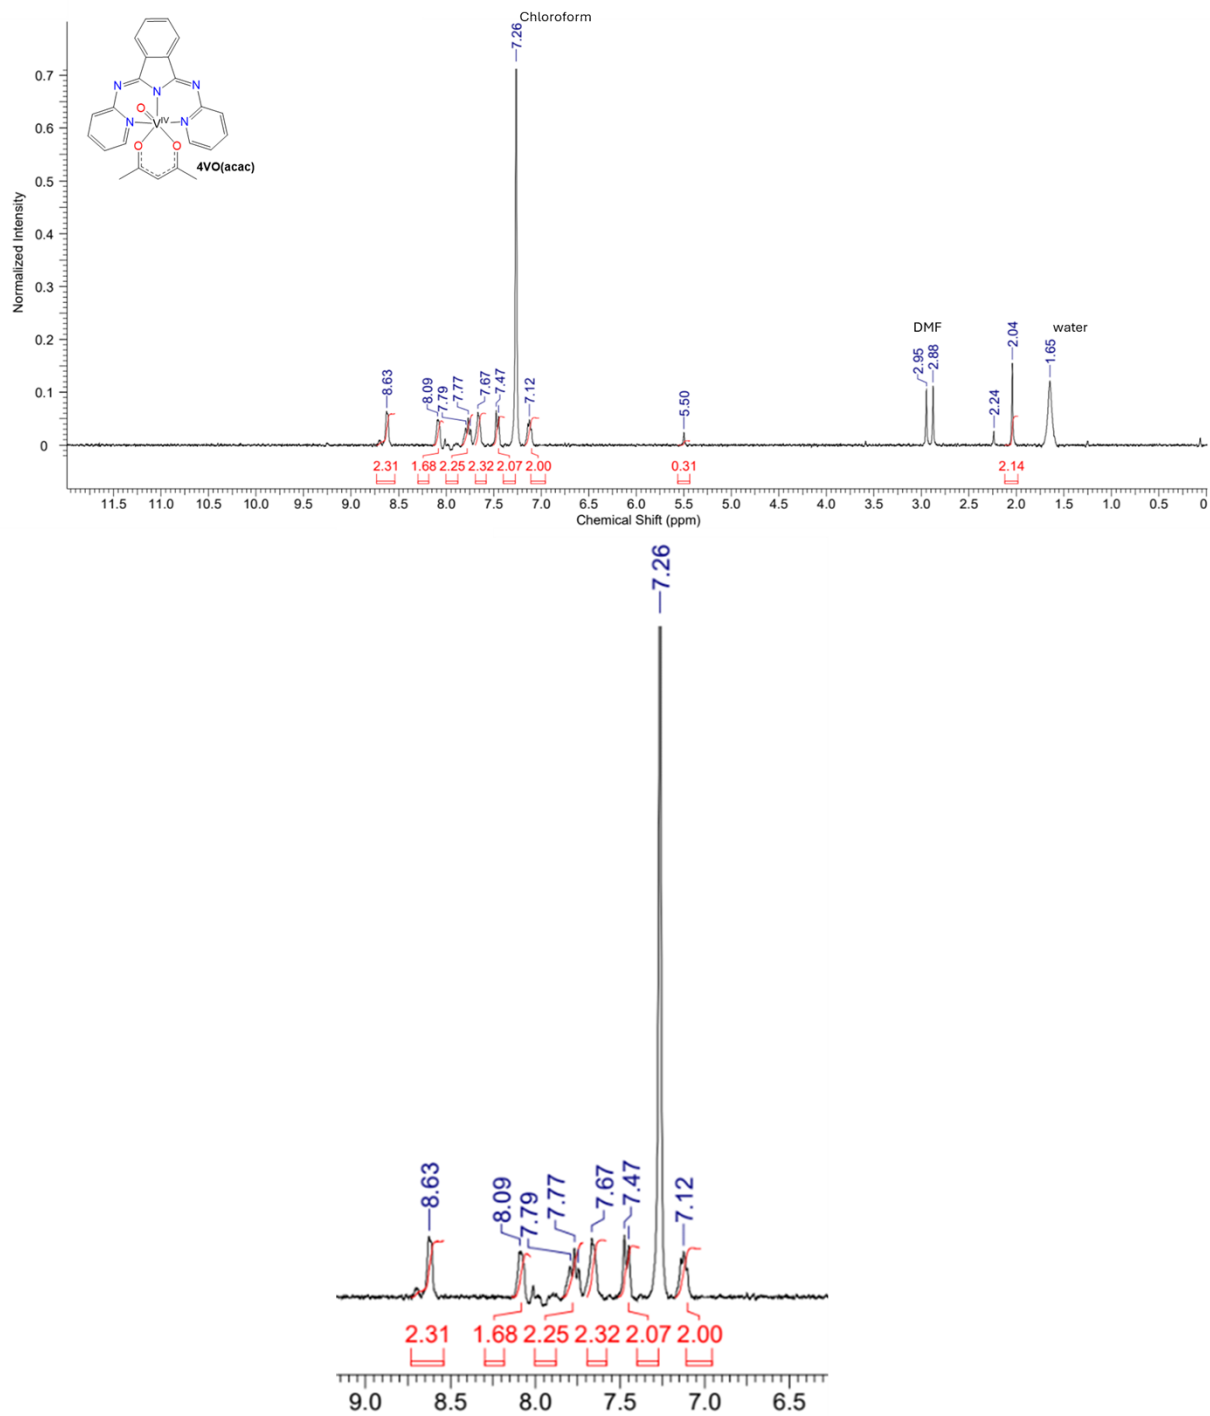

**Figure S5:**  $^1\text{H}$  NMR (300 MHz) of **4VO(acac)** in  $\text{CDCl}_3$ . Full spectrum on the top, zoomed in spectrum on the bottom.

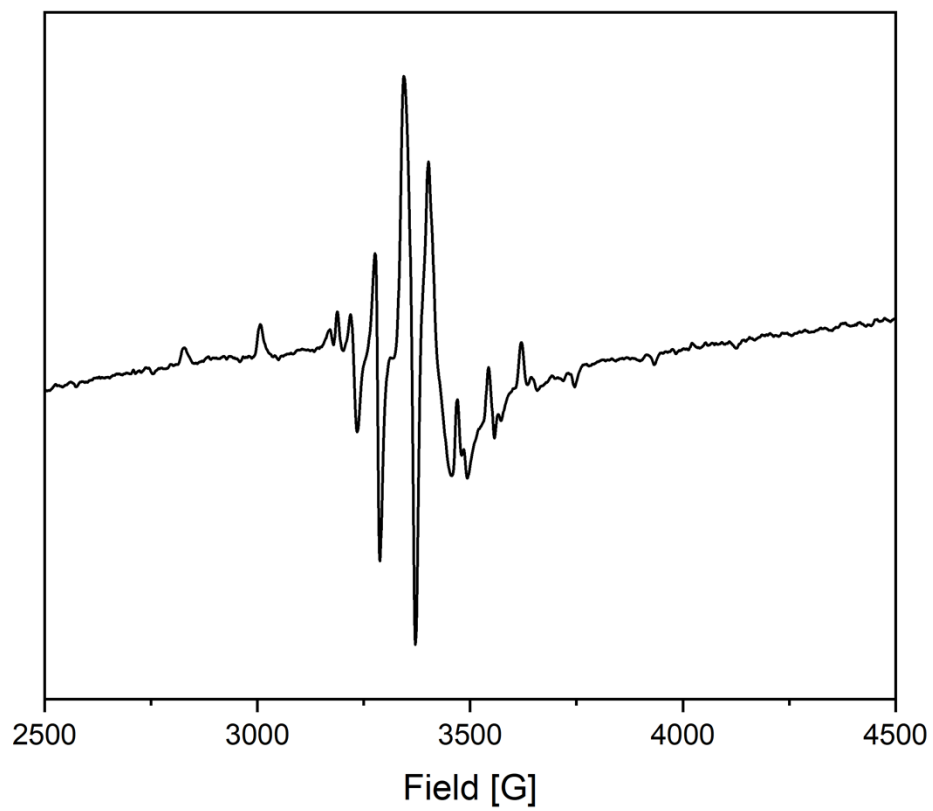

**Figure S6:** EPR spectrum of **4VO(acac)** in DMF at 130 K.

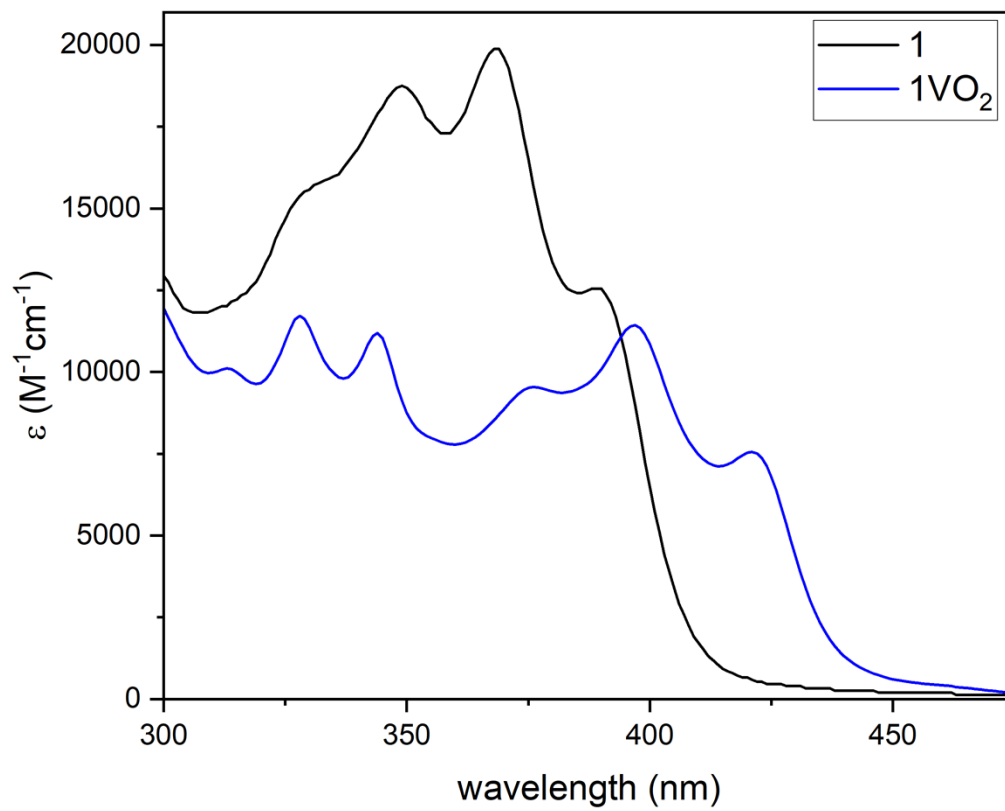

**Figure S7:** The UV-visible spectra of **1** and **1VO<sub>2</sub>** in DMF.

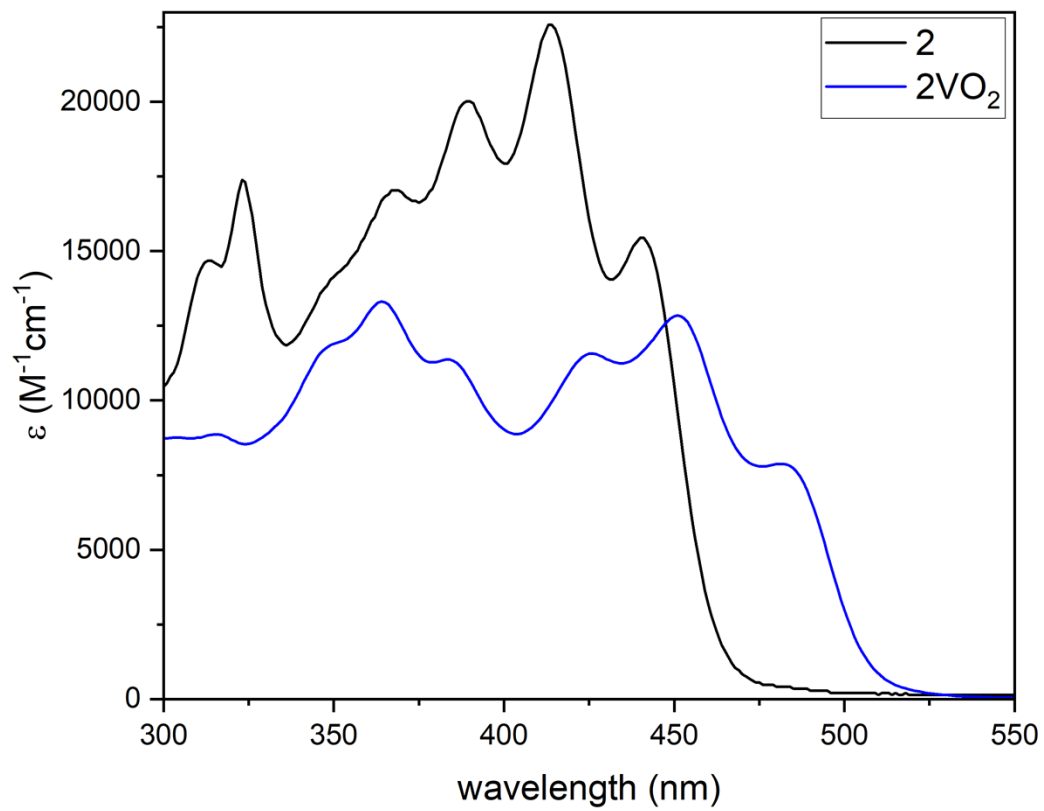

**Figure S8:** The UV-visible spectra of **2** and **2VO<sub>2</sub>** in DMF.

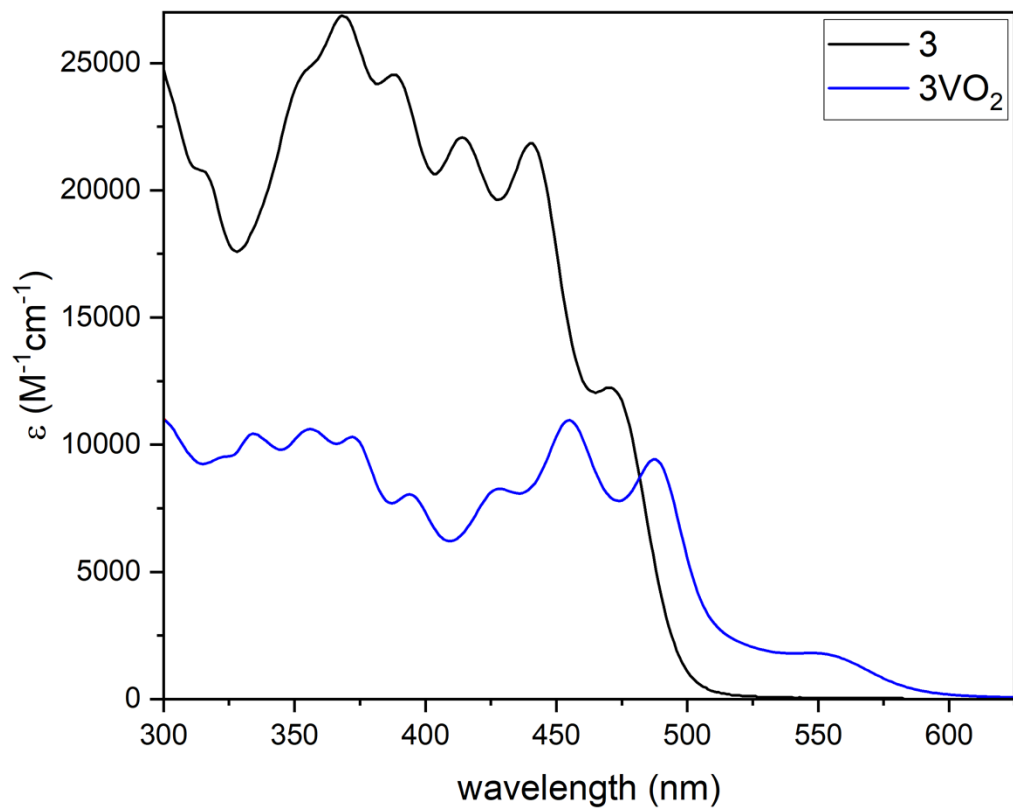

**Figure S9:** The UV-visible spectra of **3** and **3VO<sub>2</sub>** in DMF.

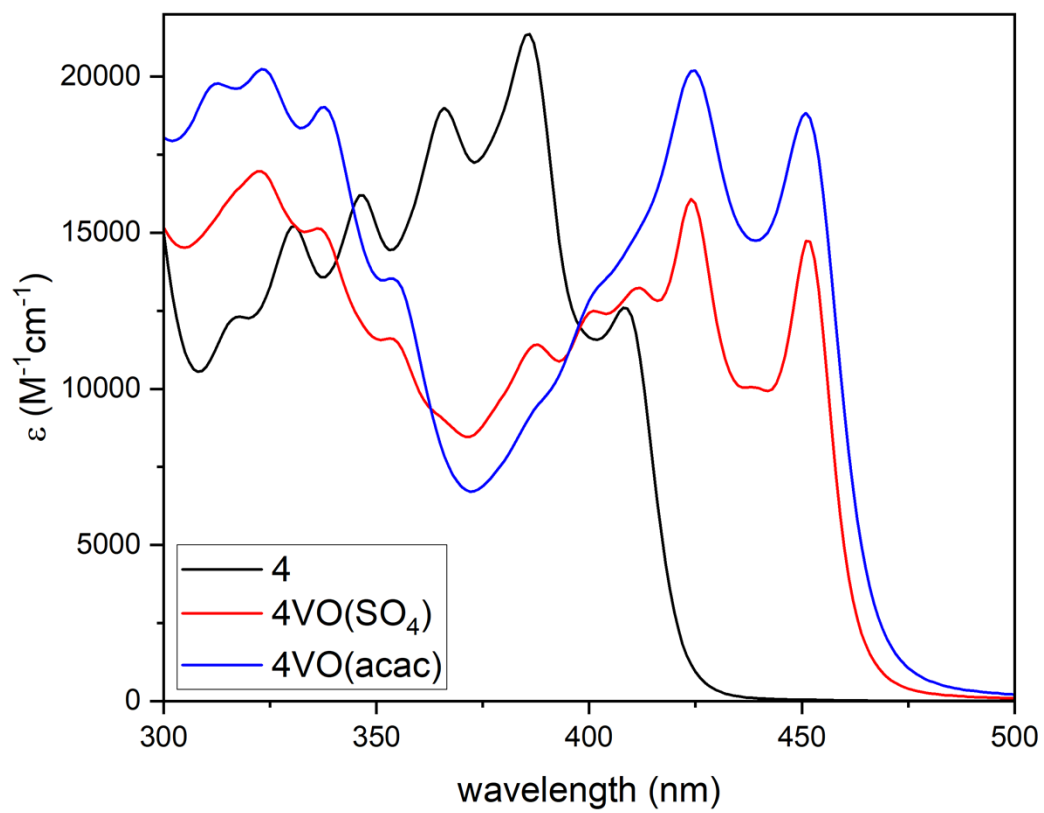

**Figure S10:** The UV-visible spectra of **4**, **4VO(acac)** and **1VO(SO<sub>4</sub>)** in DMF.

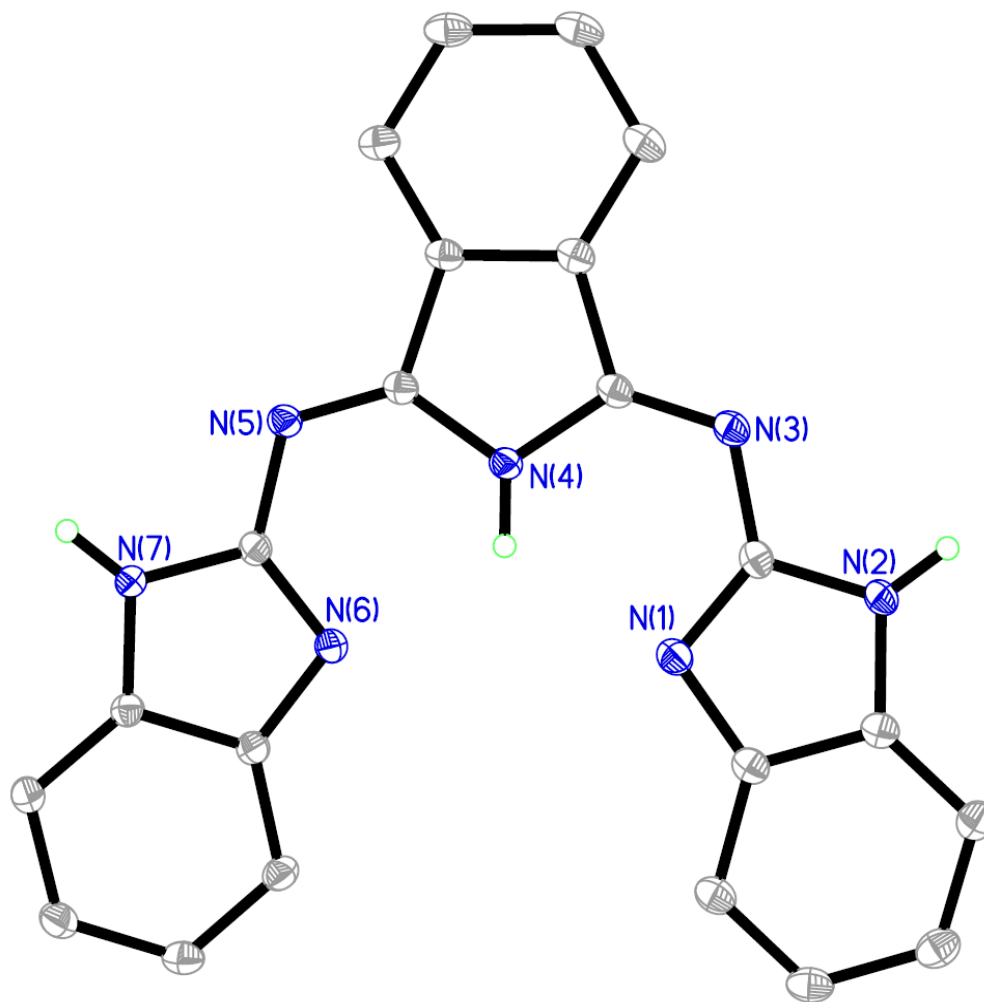

**Figure S11:** Structure of compound **3**, with 35% probability ellipsoids.

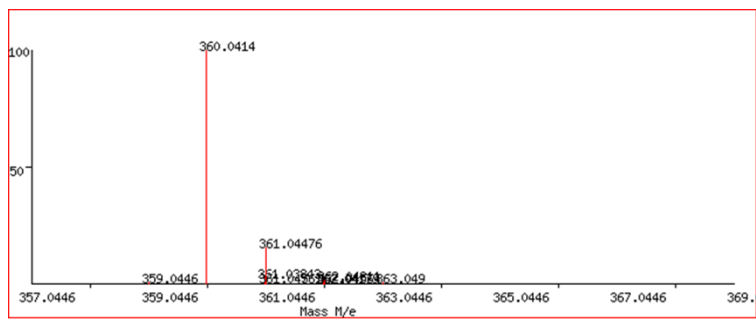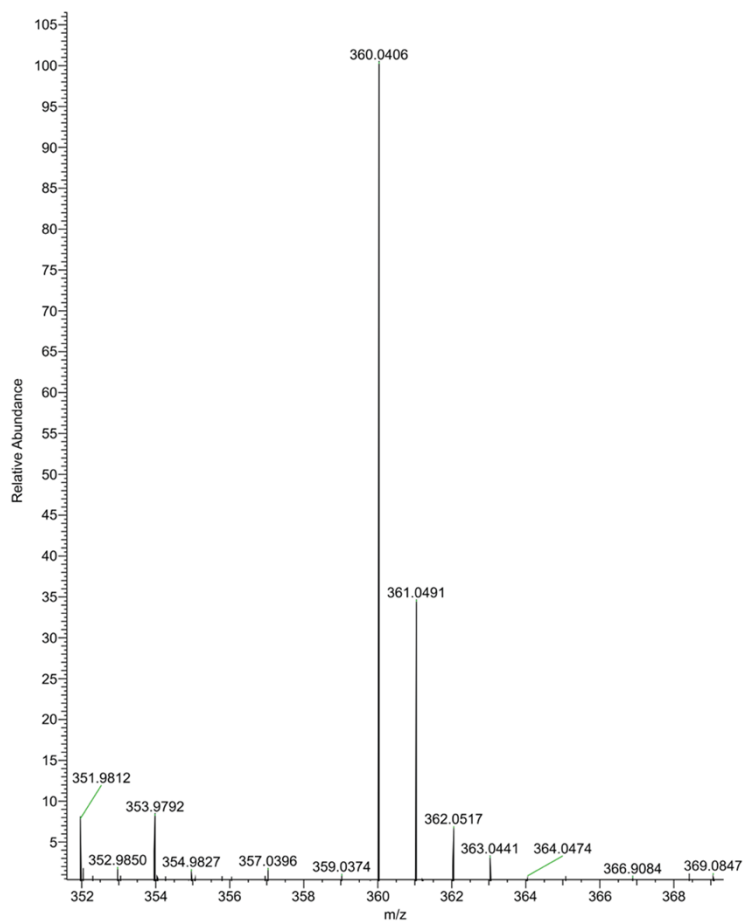

**Figure S12:** High-resolution ESI mass spectra of  $1VO_2$ . Top: calculated spectrum. Bottom: experimental spectrum.

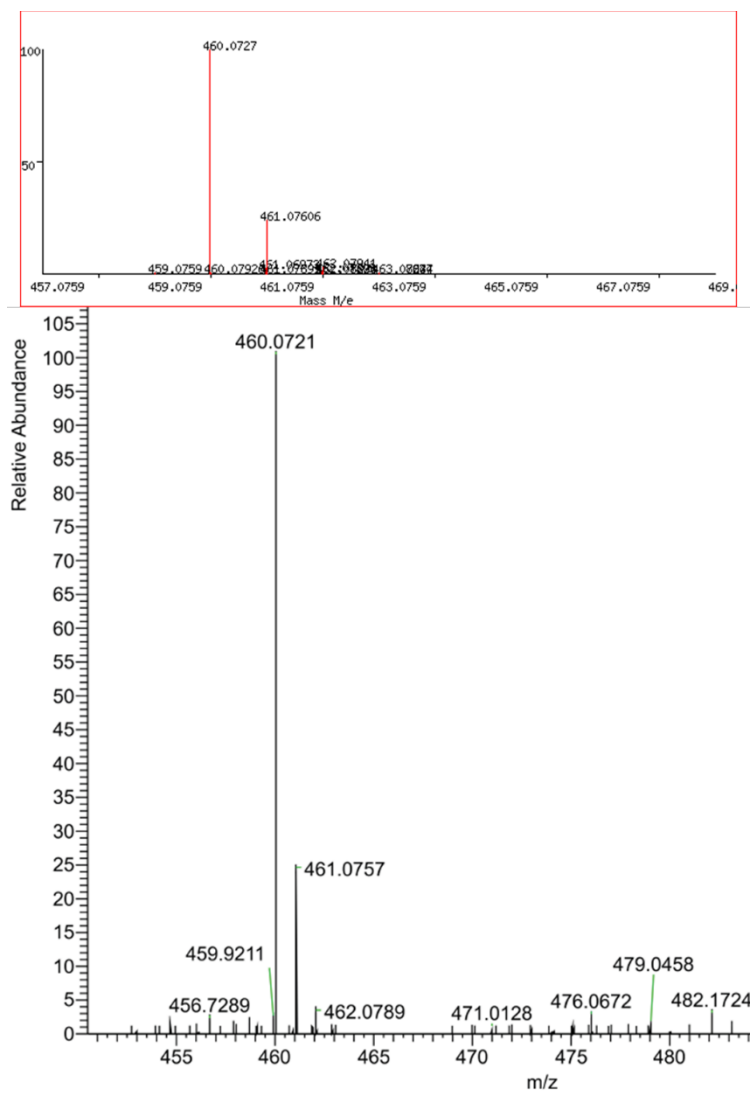

**Figure S13:** High-resolution ESI mass spectra of  $2\text{VO}_2$ . Top: calculated spectrum. Bottom: experimental spectrum.

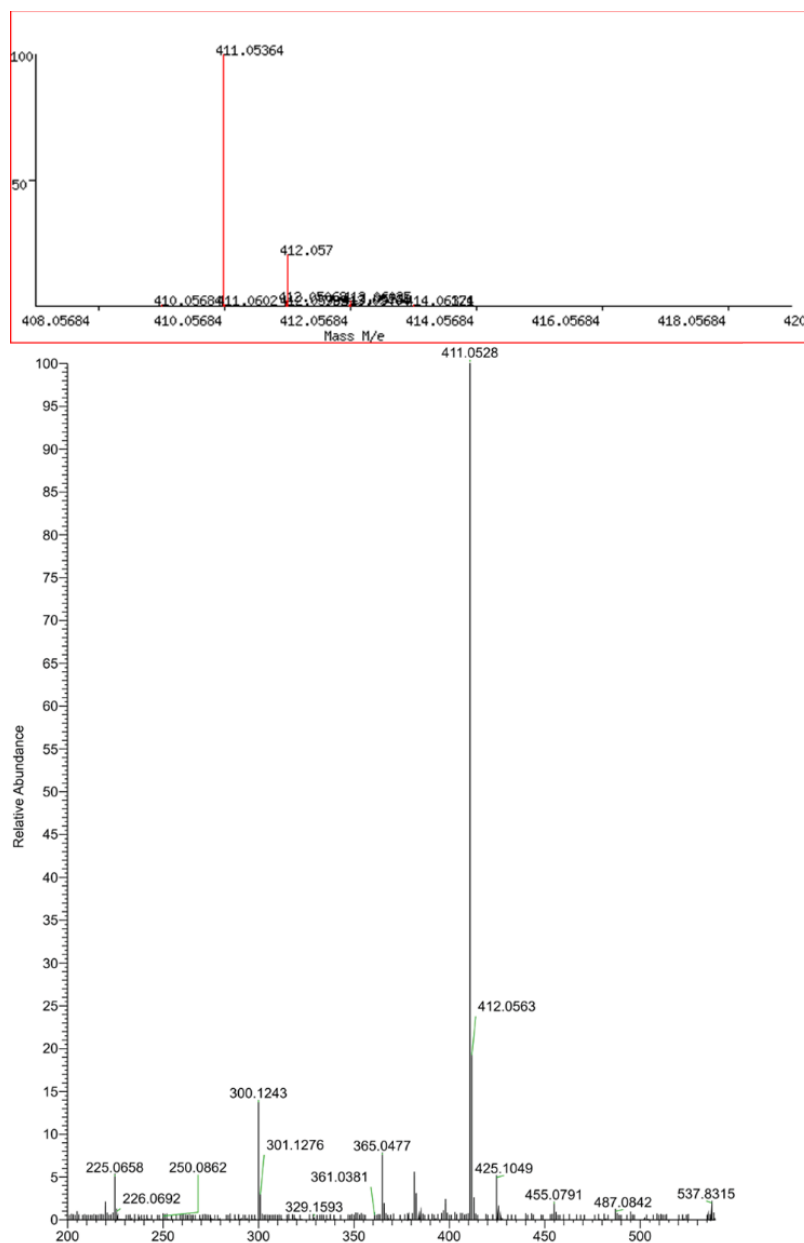

**Figure S14:** High-resolution ESI mass spectra of **4VO(SO<sub>4</sub>)**. Top: calculated spectrum. Bottom: experimental spectrum.

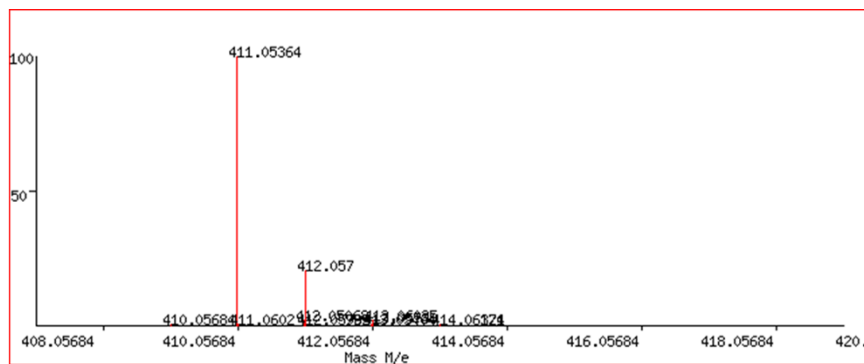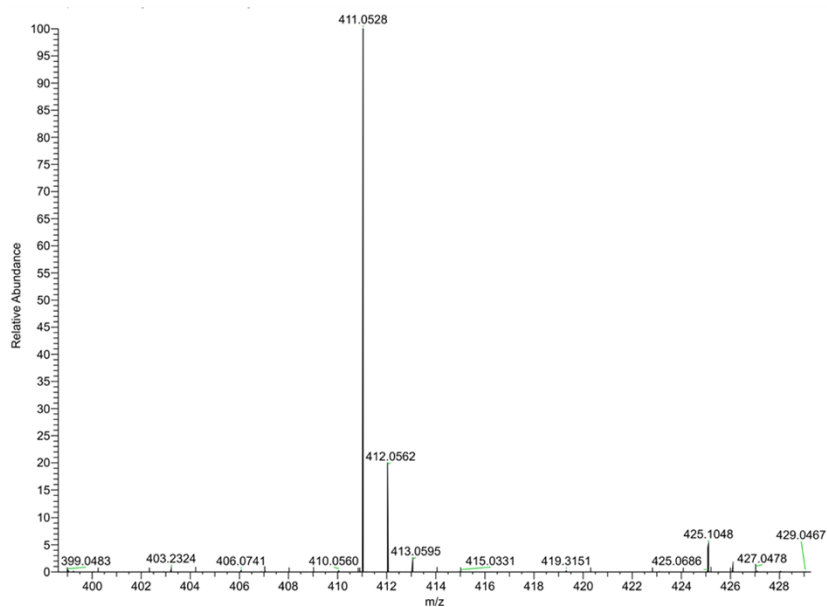

**Figure S15:** High-resolution ESI mass spectra of **4VO(acac)**. Top: calculated spectrum. Bottom: experimental spectrum.

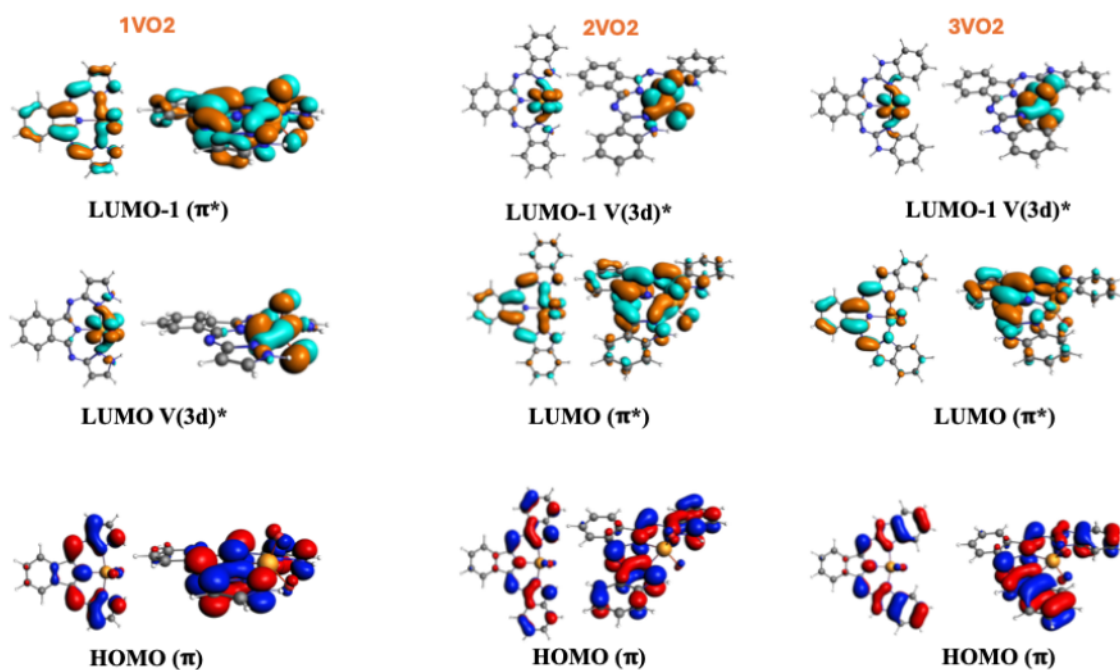

**Figure S16:** Frontier molecular orbitals for dioxovanadate complexes. Orbitals with significant vanadium 3d character were labeled V(3d)\* to represent the unoccupied character.

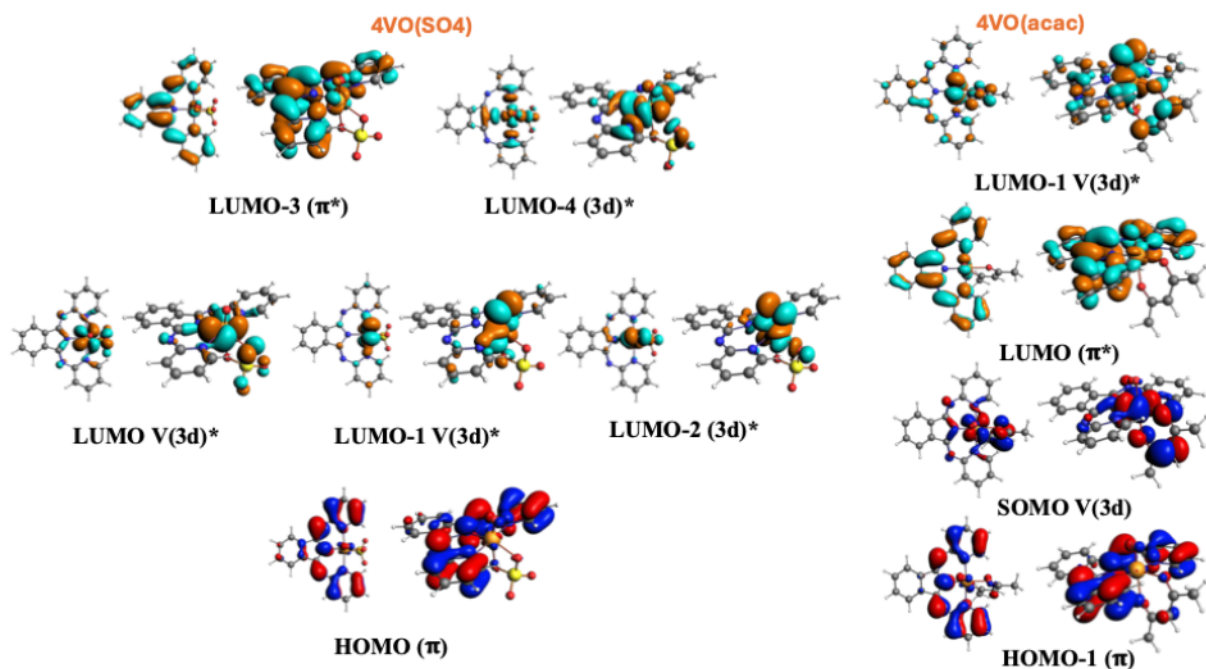

**Figure S17:** Frontier molecular orbitals for the 4VO(SO<sub>4</sub>) and 4VO(acac) complexes. Orbitals with significant vanadium 3d character were labeled V(3d) and V(3d)\* to represent the occupied and unoccupied character, respectively.

**Table S1:** X-ray crystal data and structure parameters for compounds **3** and **1VO<sub>2</sub>-3VO<sub>2</sub>**.

| <b>Compound</b>                                  | <b>3</b>                                         | <b>1VO<sub>2</sub></b>                                          | <b>2VO<sub>2</sub></b>                                          | <b>3VO<sub>2</sub></b>                                          |
|--------------------------------------------------|--------------------------------------------------|-----------------------------------------------------------------|-----------------------------------------------------------------|-----------------------------------------------------------------|
| CCDC Number                                      | 2516084                                          | 2516085                                                         | 2516086                                                         | 2516089                                                         |
| Empirical formula                                | C <sub>25</sub> H <sub>22</sub> N <sub>8</sub> O | C <sub>17</sub> H <sub>17</sub> N <sub>8</sub> O <sub>3</sub> V | C <sub>25</sub> H <sub>21</sub> N <sub>8</sub> O <sub>3</sub> V | C <sub>25</sub> H <sub>21</sub> N <sub>8</sub> O <sub>3</sub> V |
| Formula weight                                   | 450.50                                           | 432.32                                                          | 532.44                                                          | 532.4                                                           |
| Crystal system                                   | Triclinic                                        | Triclinic                                                       | Triclinic                                                       | Monoclinic                                                      |
| Space group                                      | P-1                                              | P-1                                                             | P-1                                                             | P21/n                                                           |
| a/ Å                                             | 7.758(2)                                         | 7.625(4)                                                        | 7.6599(8)                                                       | 9.9520(6)                                                       |
| b/ Å                                             | 17.004(5)                                        | 10.356(5)                                                       | 11.8170(12)                                                     | 10.4010(5)                                                      |
| c/ Å                                             | 17.093(5)                                        | 12.502(9)                                                       | 13.6367(12)                                                     | 24.4316(12)                                                     |
| α(°)                                             | 84.776(10)                                       | 80.274(18)                                                      | 82.479(4)                                                       | 90                                                              |
| β(°)                                             | 81.635(10)                                       | 80.55(3)                                                        | 78.307(4)                                                       | 93.460(2)                                                       |
| γ(°)                                             | 82.344(10)                                       | 74.511(11)                                                      | 80.915(4)                                                       | 90                                                              |
| Volume (Å <sup>3</sup> )                         | 2204.8(10)                                       | 930.4(9)                                                        | 1187.3(2)                                                       | 2524.3(2)                                                       |
| Z                                                | 4                                                | 2                                                               | 2                                                               | 4                                                               |
| Dc (Mg/m <sup>3</sup> )                          | 1.357                                            | 1.543                                                           | 1.489                                                           | 1.401                                                           |
| μ (mm <sup>-1</sup> )                            | 0.089                                            | 0.572                                                           | 0.464                                                           | 0.437                                                           |
| F(000)                                           | 944                                              | 444                                                             | 548                                                             | 1096                                                            |
| reflns collected                                 | 59861                                            | 52232                                                           | 59415                                                           | 59790                                                           |
| indep. reflns                                    | 13630                                            | 4595                                                            | 6076                                                            | 6271                                                            |
| GOF on F <sup>2</sup>                            | 1.049                                            | 1.021                                                           | 1.053                                                           | 1.096                                                           |
| R1 (on F <sub>o</sub> <sup>2</sup> , I > 2σ(I))  | 0.0613                                           | 0.0391                                                          | 0.0576                                                          | 0.0723                                                          |
| wR2 (on F <sub>o</sub> <sup>2</sup> , I > 2σ(I)) | 0.1668                                           | 0.0991                                                          | 0.1487                                                          | 0.1815                                                          |
| R1 (all data)                                    | 0.0827                                           | 0.0465                                                          | 0.0813                                                          | 0.1081                                                          |
| wR2 (all data)                                   | 0.1825                                           | 0.1029                                                          | 0.1630                                                          | 0.2031                                                          |

**Table S2:** X-ray crystal data and structure parameters for compounds **4VO(SO<sub>4</sub>)** and **4VO(acac)**.

| <b>Compound</b>                                  | <b>4VO(SO<sub>4</sub>)</b>                                       | <b>4VO(acac)</b>                                                |
|--------------------------------------------------|------------------------------------------------------------------|-----------------------------------------------------------------|
| CCDC Number                                      | 2516088                                                          | 2516087                                                         |
| Empirical formula                                | C <sub>18</sub> H <sub>12</sub> N <sub>5</sub> O <sub>5</sub> SV | C <sub>23</sub> H <sub>19</sub> N <sub>5</sub> O <sub>3</sub> V |
| Formula weight                                   | 461.33                                                           | 464.37                                                          |
| Crystal system                                   | Monoclinic                                                       | Triclinic                                                       |
| Space group                                      | C2/c                                                             | P-1                                                             |
| a/ Å                                             | 18.4471(18)                                                      | 8.195(3)                                                        |
| b/ Å                                             | 15.3588(18)                                                      | 9.970(3)                                                        |
| c/ Å                                             | 14.4190(17)                                                      | 14.012(4)                                                       |
| α(°)                                             | 90                                                               | 70.982(9)                                                       |
| β(°)                                             | 118.839(3)                                                       | 73.531(10)                                                      |
| γ(°)                                             | 90                                                               | 74.863(9)                                                       |
| Volume (Å <sup>3</sup> )                         | 3578.6(7)                                                        | 1019.8(5)                                                       |
| Z                                                | 8                                                                | 2                                                               |
| Dc (Mg/m <sup>3</sup> )                          | 1.713                                                            | 1.512                                                           |
| μ (mm <sup>-1</sup> )                            | 0.717                                                            | 0.524                                                           |
| F(000)                                           | 1872                                                             | 478                                                             |
| reflns collected                                 | 32962                                                            | 5527                                                            |
| indep. reflns                                    | 3224                                                             | 4795                                                            |
| GOF on F <sup>2</sup>                            | 1.024                                                            | 1.098                                                           |
| R1 (on F <sub>o</sub> <sup>2</sup> , I > 2σ(I))  | 0.0513                                                           | 0.0606                                                          |
| wR2 (on F <sub>o</sub> <sup>2</sup> , I > 2σ(I)) | 0.1106                                                           | .01641                                                          |
| R1 (all data)                                    | 0.0919                                                           | 0.0866                                                          |
| wR2 (all data)                                   | 0.1311                                                           | 0.1888                                                          |

**Table S3:** Selected bond lengths for **1VO<sub>2</sub>-3VO<sub>2</sub>, 4VO(SO<sub>4</sub>)** and **4VO(acac)**.

|                                    | <b>1VO<sub>2</sub></b> | <b>2VO<sub>2</sub></b> | <b>3VO<sub>2</sub></b> | <b>4VO(SO<sub>4</sub>)</b> | <b>4VO(acac)</b> |
|------------------------------------|------------------------|------------------------|------------------------|----------------------------|------------------|
| <b>V-O<sub>(V=O)</sub></b>         | 1.6319(17)             | 1.629(2)               | 1.612(3)               | 1.590(3)                   | 1.607(2)         |
|                                    | 1.6221(15)             | 1.610(2)               | 1.609(3)               |                            |                  |
| <b>V-N<sub>(isoindoline)</sub></b> | 2.0935(18)             | 2.062(2)               | 2.123(2)               | 2.032(3)                   | 2.008(3)         |
| <b>V-N<sub>(aryl)</sub></b>        | 2.0417(17)             | 2.092(2)               | 2.057(3)               | 2.142(3)                   | 2.148(3)         |
|                                    | 2.0492(17)             | 2.062(2)               | 2.060(3)               | 2.132(3)                   | 2.150(3)         |
| <b>V-O<sub>(SO4)</sub></b>         | --                     | --                     | --                     | 2.027(3)                   | --               |
|                                    |                        |                        |                        | 2.235(3)                   |                  |
| <b>V-O<sub>(acac)</sub></b>        | --                     | --                     | --                     | --                         | 2.024(2)         |
|                                    |                        |                        |                        |                            | 2.166(2)         |
